# Supplementary material for: Immunogenicity and Protective Efficacy of Radiation-Attenuated and Chemo-Attenuated PfSPZ Vaccines in Equatoguinean Adults
Source: PubMed Central journal article supplement (PMC7790068; doi:10.4269/ajtmh.20-0435), 2020-11-16
Supplement: tpmd200435.SD1.pdf [file tpmd200435.SD1.pdf]

1 **SUPPLEMENTAL DATA**

2  
3 **Figure legends**

4 **Figure S1. Proposed study schedule and schedule as executed.** This trial was originally  
5 designed to enroll 26 subjects into the PfSPZ Vaccine arm and 26 subjects into the PfSPZ-CVac  
6 arm and randomize within each arm 20 subjects to vaccine and 6 subjects to control.  
7 Immunizations in the PfSPZ-Vaccine arm were scheduled for 1, 9 and 17 weeks and PfSPZ-  
8 CVac for 9, 13 and 17 weeks so that both groups could undergo CHMI at the same time (10±1  
9 weeks after the 3<sup>rd</sup> dose). Due to challenges in recruitment the PfSPZ-CVac arm was broken into  
10 2 cohorts, the first of which began immunizations on schedule with the second cohort delayed by  
11 5 weeks. An unanticipated safety hold to evaluate a SAE led to additional delay with the 3<sup>rd</sup> dose  
12 for the second cohort administer 13 weeks after the second dose instead of 4 weeks. For these  
13 subjects CHMI was delayed to allow a minimum of 10 weeks between the 3<sup>rd</sup> dose and CHMI. A  
14 few subjects encountered additional delays due to intercurrent malaria infections from natural  
15 exposure.

16  
17  
18 **Figure S2. Antibodies to PfCSP and MSP-1 by ELISA.** IgG antibodies to Pf  
19 circumsporozoite protein PfCSP by ELISA two weeks after the 3<sup>rd</sup> dose (panel A) and at the time  
20 of CHMI (panel B) comparing PfSPZ Vaccine and PfSPZ-CVac are presented as OD 1.0 ratios  
21 and correspond to the net OD 1.0 values presented in Figure 3 panels A and B. IgG antibodies to  
22 Pf circumsporozoite protein PfCSP by ELISA two weeks after the 3<sup>rd</sup> dose (panel C) and at the  
23 time of CHMI (panel D) comparing infected and uninfected subjects in PfSPZ Vaccine and  
24 PfSPZ-CVac are presented as OD 1.0 ratios and correspond to the net OD 1.0 values presented in  
25 Figure 3 panels C and D. IgG antibodies to Pf merozoite surface protein-1 PfPfMSP-1 by ELISA

26 measured at the time of CHMI (panel E) comparing PfSPZ Vaccine and PfSPZ-CVac. Filled  
27 circles (●) represent subjects remaining uninfected after CHMI; open circles (○) represent  
28 subjects infected after CHMI.

29

30 Antibody responses to PfCSP 2 weeks after the 3<sup>rd</sup> dose (panel A) were significantly higher in  
31 the PfSPZ Vaccine group (median OD 1.0 ratio = 38.70) than in the PfSPZ-CVac group (median  
32 OD 1.0 ratio = 2.48) ( $p=0.0043$ , Wilcoxon signed-rank test, 2 tailed). The PfSPZ-CVac group  
33 had higher antibody levels than normal saline controls 2 weeks after 3<sup>rd</sup> dose (median OD 1.0  
34 ratio = 1.02) ( $p<0.0001$ , Wilcoxon signed-rank test, 2 tailed). Antibody responses to PfCSP the  
35 day prior to CHMI (panel B) were significantly higher in the PfSPZ Vaccine group (median OD  
36 1.0 ratio 43.84) than in the PfSPZ-CVac group (OD 1.0 ratio 4.10) ( $p<0.0001$ , Mann-Whitney  
37 test, 2 tailed). The PfSPZ-CVac group had higher antibody levels than normal saline controls  
38 prior to CHMI (median OD 1.0 ratio = 1.27,  $p<0.0001$ , Wilcoxon signed-rank test, 2 tailed).

39

40 Median OD 1.0 ratio of PfCSP antibodies measured 2 weeks after the 3<sup>rd</sup> dose (panel C) in the  
41 PfSPZ Vaccine group were higher in uninfected vs that in infected subjects (median OD 1.0 ratio  
42 67.57 vs 40.35,  $p=0.59$ , Wilcoxon signed-rank test, 2 tailed), but the difference was not  
43 significant. Likewise, there was no significant difference in antibody levels 2 weeks after the 3<sup>rd</sup>  
44 dose between subjects who received PfSPZ-CVac who were not infected, versus those who  
45 became infected (median OD 1.0 ratio 3.76 vs 4.90,  $p=0.93$ ).

46

47 Prior to CHMI (panel D) the uninfected PfSPZ Vaccine group also had a higher median OD 1.0  
48 ratio, but this did not reach the level of statistical significance (median OD 1.0 ratio 61.28 vs

49 20.11,  $p=0.15$ , Wilcoxon signed-rank test, 2 tailed). In subjects who received PfSPZ-CVac who  
50 were uninfected or infected the median OD 1.0 ratios was higher, but not significantly (6.04 vs  
51 3.49,  $p=0.35$ ).

52

53 In subjects who received PfSPZ Vaccine who were uninfected the PfMSP-1 (panel E) median  
54 OD 1.0 measured prior to CHMI was higher than that of infected subjects (median OD 1.0 = 889  
55 vs 62), but not significantly ( $p=0.406$ ) (Table S5). Subjects who received PfSPZ-CVac and were  
56 uninfected also had higher antibodies to PfMSP-1 prior to CHMI than the infected subjects  
57 (median OD 1.0 = 1518 vs 605), but the difference was not significant ( $p=0.880$ ) (Table S5).

58

59

60



70

A. 2 weeks after 3<sup>rd</sup> dose.

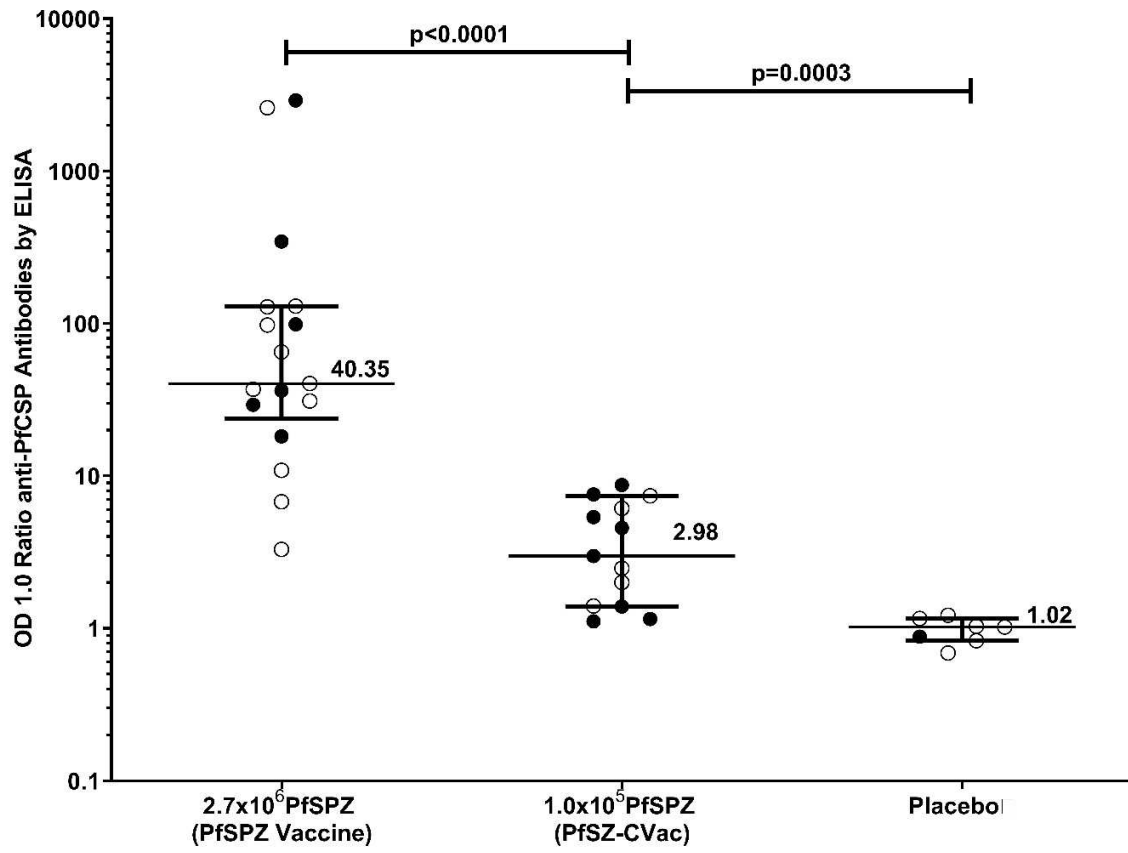

Mann-Whitney test, 2 tailed

71

72

73

74

### B. Pre-CHMI

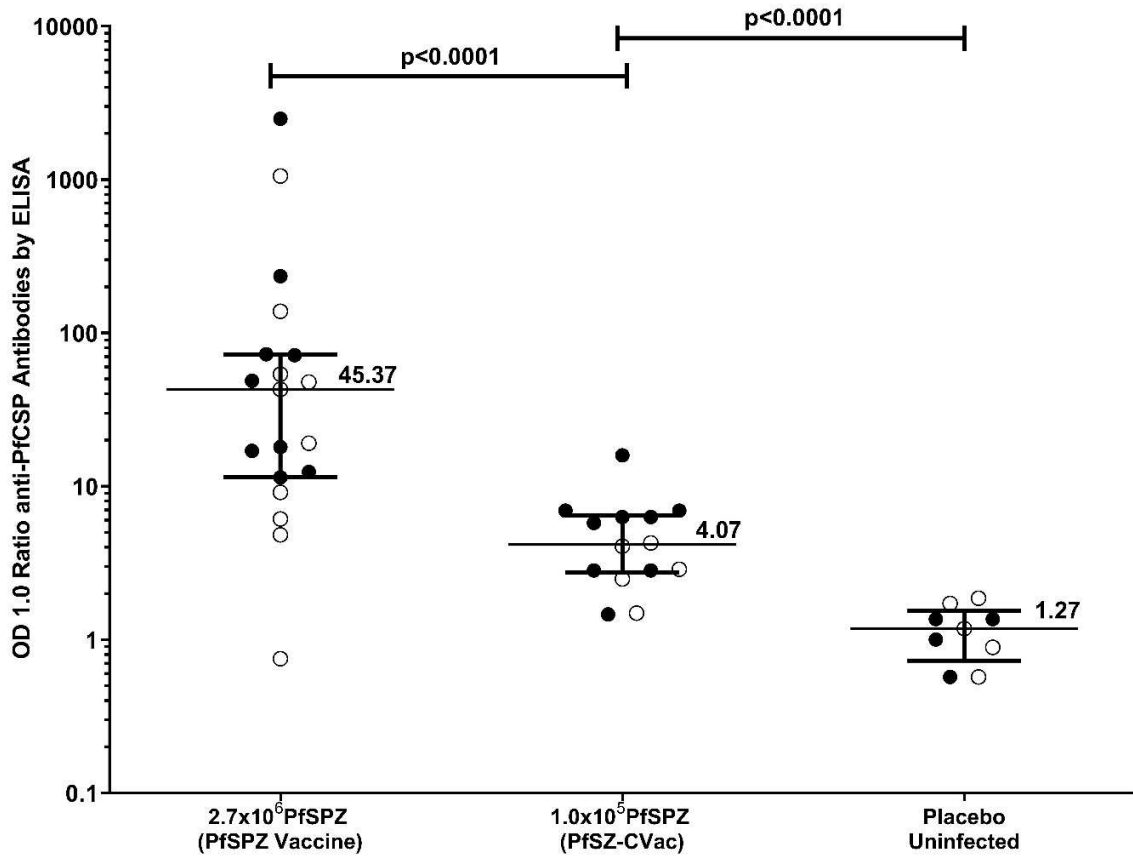

Mann-Whitney test, 2 tailed

75

76

77

78

C. 2 weeks after 3<sup>rd</sup> dose

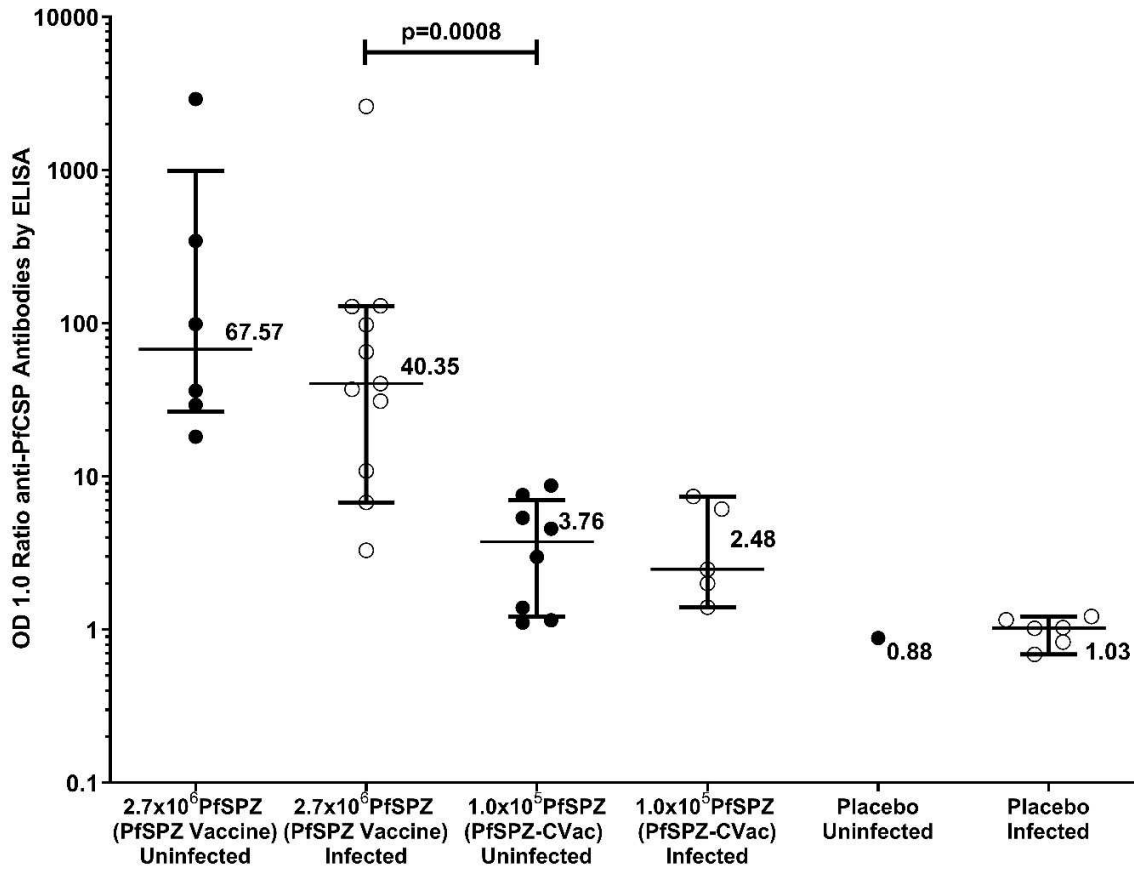

79

80

81

82

83

### D. Pre-CHMI

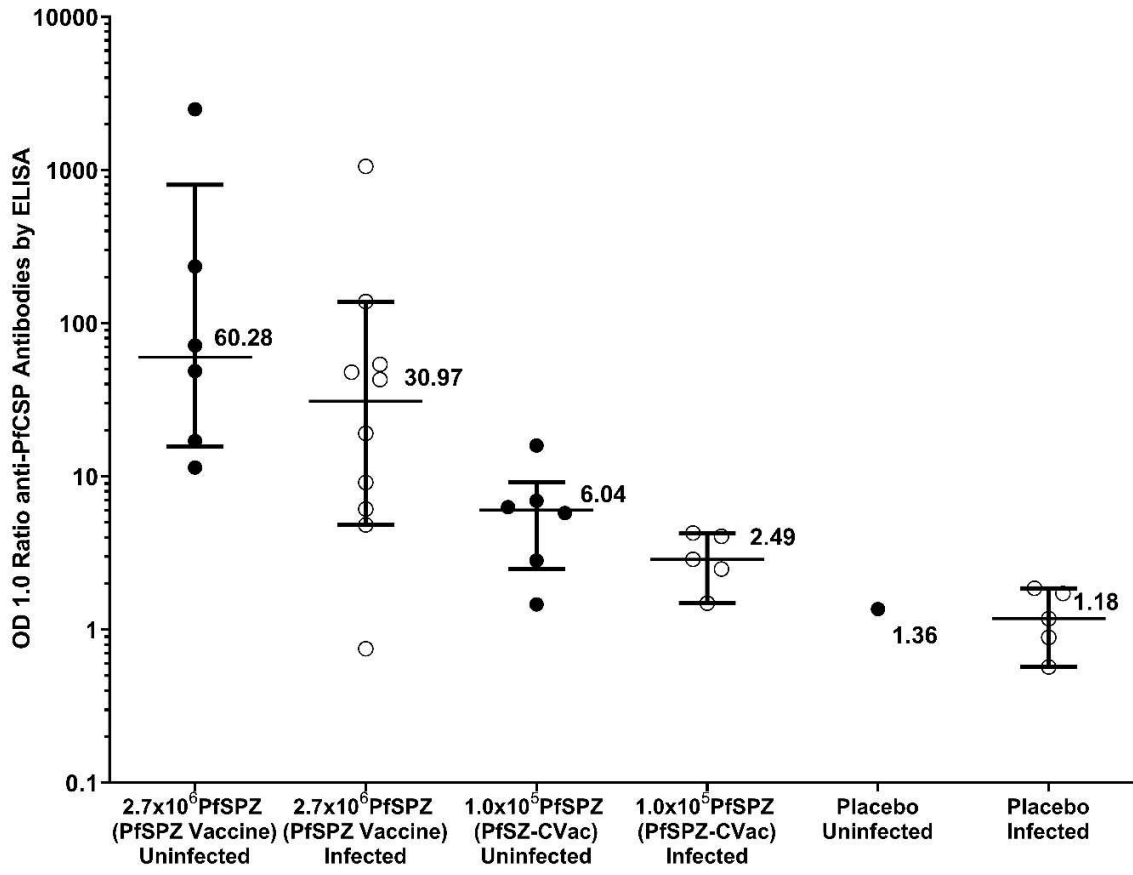

84



85

86 E. PfMSP-1 pre-CHMI

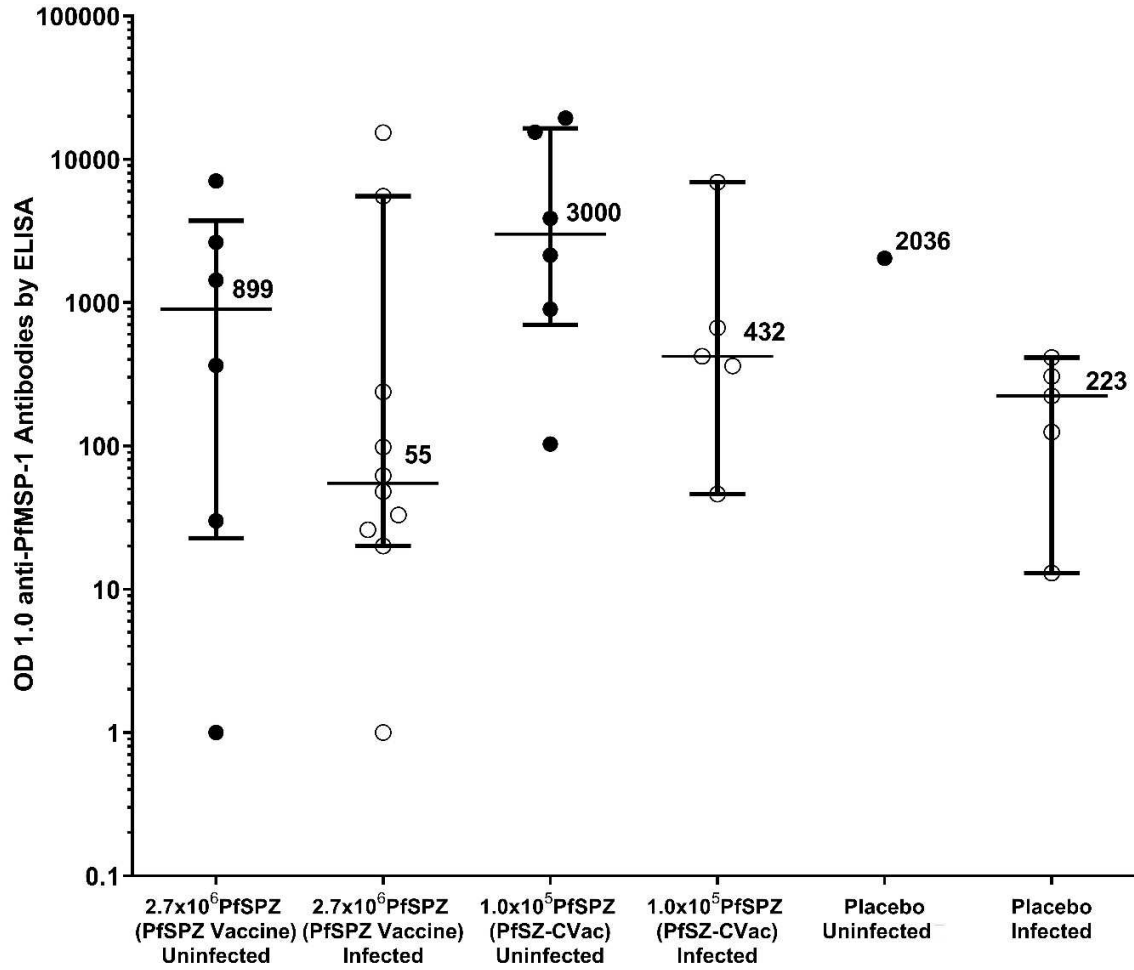

87

88

89

90 Figure S2

91 **Table S1: Inclusion Criteria**

- 92 1. Healthy males and females, based on clinical and laboratory findings
- 93 2. Age 6 months to 65 years
- 94 3. Adults with a Body Mass Index (BMI) 18 to 30 Kg/m<sup>2</sup>; or adolescents, children and infants  
95 with Z-score of the selected indicator ([weight-for-height], [(height and BMI) for age])  
96 category within  $\pm 2SD$ .
- 97 4. Long-term (at least one year) or permanent residence in the Baney district or Malabo city
- 98 5. Agreement to release medical information and to inform the study doctor concerning  
99 contraindications for participation in the study
- 100 6. Willingness to be attended to by a study clinician and take all necessary medications  
101 prescribed during study period
- 102 7. Agreement to provide contact information of a third party household member or close friend  
103 to study team
- 104 8. Agreement not to participate in another clinical trial during the study period
- 105 9. Agreement not to donate blood during the study period
- 106 10. Able and willing to complete the study visit schedule over the study follow up period,  
107 including the hospitalizations required for protocol compliance
- 108 11. Willingness to undergo HIV, hepatitis B (HBV) and hepatitis C (HCV) tests
- 109 12. Volunteer (subjects 18 years of age and older) or the parent / guardian signing the informed  
110 consent (for subjects <18 years of age) is able to demonstrate their understanding of the study  
111 by responding correctly to 10 out of 10 true/false statements (in a maximum of two attempts  
112 for those who failed to respond correctly to all true/false statements in the first attempt).
- 113 13. Signed written informed consent, in accordance with local practice, provided by adult  
114 volunteers, parents or legal representatives and relevant assent for children participants as  
115 applicable.
- 116 14. Free from malaria parasitemia by blood smear at enrollment and by PCR for group 1
- 117 15. Has not been treated with any antimalarial medication for at least two weeks prior to the  
118 first immunization.
- 119 16. Free from helminth infections (detected by microscopy) at enrollment.
- 120 17. Female volunteers aged 9 years and above must be non-pregnant (as demonstrated by a  
121 negative urine pregnancy test), and those aged 13 to 49 years provide consent/assent of their  
122 willingness to take protocol-defined measures not to become pregnant during the study and  
123 safety follow-up period.

124

125

126 **Table S2: Exclusion Criteria**

- 127 1. Previous receipt of an investigational malaria vaccine in the last 5 years
- 128 2. Participation in any other clinical study involving investigational medicinal products  
129 including investigational malaria drugs within 30 days prior to the onset of the study or  
130 during the study period
- 131 3. History of arrhythmias or prolonged QT-interval or other cardiac disease, or clinically  
132 significant abnormalities in electrocardiogram (ECG) at screening
- 133 4. Positive family history in a 1st or 2nd degree relative for cardiac disease at age <50 years old
- 134 5. A history of psychiatric disease
- 135 6. Suffering from any chronic illness including; diabetes mellitus, cancer or HIV/AIDS
- 136 7. Any confirmed or suspected immunosuppressive or immune-deficient condition, including  
137 asplenia
- 138 8. History of drug or alcohol abuse interfering with normal social function
- 139 9. The use of chronic immunosuppressive drugs or other immune modifying drugs within three  
140 months of study onset (inhaled and topical corticosteroids are allowed) and during the study  
141 period
- 142 10. Any clinically significant deviation from the normal range in biochemistry or hematology  
143 blood tests or in urine analysis
- 144 11. Positive HIV, hepatitis B virus or hepatitis C virus tests
- 145 12. Volunteers who are have risk factors for tuberculosis and/or signs and symptoms of  
146 tuberculosis (TB), plus a positive tuberculin skin test (TST).
- 147 13. Symptoms, physical signs and laboratory values suggestive of systemic disorders including  
148 renal, hepatic, blood, cardiovascular, pulmonary, skin, immunodeficiency, psychiatric, and  
149 other conditions which could interfere with the interpretation of the study results or  
150 compromise the health of the volunteers
- 151 14. Any medical, social condition, or occupational reason that, in the judgment of the  
152 investigator, is a contraindication to protocol participation or impairs the volunteer's ability  
153 to give informed consent, increases the risk to the volunteer because of participation in the  
154 study, affects the ability of the volunteer to participate in the study or impairs the quality,  
155 consistency or interpretation of the study data.
- 156 15. History of non-febrile seizures or atypical febrile seizures.

157

158

159

160

161 **Table S3: List of solicited adverse events with the grading system for severity and grading**  
 162 **for relatedness\*.**

|                                                                 |                                                                                                                                                                                                                                                                                     |                                                                                                                                                                                                                                                             |                                                              |                                                              |
|-----------------------------------------------------------------|-------------------------------------------------------------------------------------------------------------------------------------------------------------------------------------------------------------------------------------------------------------------------------------|-------------------------------------------------------------------------------------------------------------------------------------------------------------------------------------------------------------------------------------------------------------|--------------------------------------------------------------|--------------------------------------------------------------|
| Local Solicited AEs (at injection site)                         | <ul style="list-style-type: none"> <li>• Pain</li> <li>• Tenderness</li> <li>• Pruritus</li> </ul>                                                                                                                                                                                  | 1                                                                                                                                                                                                                                                           | Daily activity minimally affected, with or without treatment |                                                              |
|                                                                 |                                                                                                                                                                                                                                                                                     | 2                                                                                                                                                                                                                                                           | Daily activity possible but only with treatment              |                                                              |
|                                                                 |                                                                                                                                                                                                                                                                                     | 3                                                                                                                                                                                                                                                           | Daily activity not possible even with treatment              |                                                              |
|                                                                 | <ul style="list-style-type: none"> <li>• Erythema</li> <li>• Swelling</li> <li>• Induration</li> <li>• Bruising/extravasated blood</li> </ul>                                                                                                                                       | 1                                                                                                                                                                                                                                                           | 2.5 – 5 cm                                                   |                                                              |
|                                                                 |                                                                                                                                                                                                                                                                                     | 2                                                                                                                                                                                                                                                           | 5.1 – 10 cm                                                  |                                                              |
|                                                                 |                                                                                                                                                                                                                                                                                     | 3                                                                                                                                                                                                                                                           | >10 cm, necrosis or exfoliative dermatitis                   |                                                              |
| Systemic Solicited (Core List-post Vaccination)                 | <ul style="list-style-type: none"> <li>• Fever</li> </ul>                                                                                                                                                                                                                           | 1                                                                                                                                                                                                                                                           | 38.0°C – 38.4°C                                              |                                                              |
|                                                                 |                                                                                                                                                                                                                                                                                     | 2                                                                                                                                                                                                                                                           | 38.5°C – 38.9°C                                              |                                                              |
|                                                                 |                                                                                                                                                                                                                                                                                     | 3                                                                                                                                                                                                                                                           | >39.0°C                                                      |                                                              |
|                                                                 | <u>Adults, adolescents and older children</u>                                                                                                                                                                                                                                       | <ul style="list-style-type: none"> <li>• Allergic reaction (rash, urticaria, pruritis, edema)</li> <li>• Headache</li> <li>• Subjective Fever**</li> <li>• Fatigue</li> <li>• Malaise</li> <li>• Chills</li> <li>• Myalgia</li> <li>• Arthralgia</li> </ul> | 1                                                            | Daily activity minimally affected, with or without treatment |
|                                                                 |                                                                                                                                                                                                                                                                                     |                                                                                                                                                                                                                                                             | 2                                                            | Daily activity possible but only with treatment              |
|                                                                 | <u>Infants and younger children</u>                                                                                                                                                                                                                                                 | <ul style="list-style-type: none"> <li>• Allergic reaction (rash, urticaria, pruritis, edema)</li> <li>• Subjective fever*</li> <li>• Drowsiness</li> <li>• Irritability/fussiness</li> <li>• Inability/refusal to eat or drink</li> </ul>                  | 3                                                            | Daily activity not possible even with treatment              |
| Post CHMI Malaria Signs and Symptoms (In addition to Core List) | <ul style="list-style-type: none"> <li>• Dizziness</li> <li>• Rigors</li> <li>• Sweats</li> <li>• Cough</li> <li>• Nausea</li> <li>• Vomiting</li> <li>• Abdominal pain</li> <li>• Diarrhea</li> <li>• Chest pain</li> <li>• Palpitations</li> <li>• Shortness of breath</li> </ul> | 1                                                                                                                                                                                                                                                           | Daily activity minimally affected, with or without treatment |                                                              |
|                                                                 |                                                                                                                                                                                                                                                                                     | 2                                                                                                                                                                                                                                                           | Daily activity possible but only with treatment              |                                                              |
|                                                                 |                                                                                                                                                                                                                                                                                     | 3                                                                                                                                                                                                                                                           | Daily activity not possible even with treatment              |                                                              |

163  
 164  
 165  
 166  
 167  
 168  
 169  
 170

\*AEs (solicited and unsolicited) were recorded and graded by physicians: mild (easily tolerated), moderate (interfere with normal activity), severe (prevents normal activity) or life threatening (Table S3). Axillary temperature was Grade 1 (38.0-38.4°C), Grade 2 (38.5–38.9°C) or Grade 3 (> 39.0°C). Hematological and biochemical abnormalities were assessed using standard clinical assays. All AEs were assessed for severity and relatedness to IP administration. AEs were classified as definitely related, probably related, possibly related, unlikely to be related, or not related. Definitely, probably, and possibly were classified as related to IP administration; unlikely to be related and not related were classified unrelated.

\*\* Perceived by the subject and/or subject's guardian

171

172 **Table S4: Solicited adverse events for CVac**

| <b>Chloroquine Only Dosing Period</b>                                                                          |                                                                                                                                              | <b>Post Immunization during CQ Administration</b>                                                                                                             |  |
|----------------------------------------------------------------------------------------------------------------|----------------------------------------------------------------------------------------------------------------------------------------------|---------------------------------------------------------------------------------------------------------------------------------------------------------------|--|
| <b>CQ</b>                                                                                                      | <b>Chloroquine + PfSPZ Challenge (CQ+CH)</b>                                                                                                 | <b>Chloroquine + Parasitemia (CQ + P)</b>                                                                                                                     |  |
| <i>CQ solicited AEs will be collected from the Day of the first dose through + 7 days after the last dose.</i> | <i>Six (6) additional signs/symptoms (with CQ solicited AEs) will be solicited from day of PfSPZ Challenge Vaccination through + 5 days.</i> | <i>Twelve (12) additional signs/symptoms (with CQ solicited AEs) will be solicited from + 6 days following PfSPZ Challenge Vaccination through + 12 days.</i> |  |
| <b>Days CV-2, CV-1</b>                                                                                         | <b>Days 1 to 6 (CV<sub>1</sub> to CV<sub>1</sub>+5)</b>                                                                                      | <b>Days 7 to 13 (CV<sub>1</sub>+6 to CV<sub>1</sub>+12)</b>                                                                                                   |  |
| <b>Days 14 to 28 (CV<sub>1</sub>+13 to CV<sub>1</sub>+27)</b>                                                  | <b>Days 29 to 34 (CV<sub>2</sub> to CV<sub>2</sub>+5)</b>                                                                                    | <b>Days 35 to 41 (CV<sub>2</sub>+6 to CV<sub>2</sub>+12)</b>                                                                                                  |  |
| <b>Days 42 to 56 (CV<sub>2</sub>+13 to CV<sub>2</sub>+27)</b>                                                  | <b>Days 57 to 62 (CV<sub>3</sub> to CV<sub>3</sub>+5)</b>                                                                                    | <b>Days 63 to 69 (CV<sub>3</sub>+6 to CV<sub>3</sub>+12)</b>                                                                                                  |  |
| 1 Nausea                                                                                                       | 1 Nausea                                                                                                                                     | 1 Nausea                                                                                                                                                      |  |
| 2 Vomiting                                                                                                     | 2 Vomiting                                                                                                                                   | 2 Vomiting                                                                                                                                                    |  |
| 3 Diarrhea                                                                                                     | 3 Diarrhea                                                                                                                                   | 3 Diarrhea                                                                                                                                                    |  |
| 4 Abdominal pain                                                                                               | 4 Abdominal pain                                                                                                                             | 4 Abdominal pain                                                                                                                                              |  |
| 5 Dizziness                                                                                                    | 5 Dizziness                                                                                                                                  | 5 Dizziness                                                                                                                                                   |  |
| 6 Tinnitus                                                                                                     | 6 Tinnitus                                                                                                                                   | 6 Tinnitus                                                                                                                                                    |  |
| 7 Blurred vision                                                                                               | 7 Blurred vision                                                                                                                             | 7 Blurred vision                                                                                                                                              |  |
| 8 Photosensitivity                                                                                             | 8 Photosensitivity                                                                                                                           | 8 Photosensitivity                                                                                                                                            |  |
| 9 Insomnia                                                                                                     | 9 Insomnia                                                                                                                                   | 9 Insomnia                                                                                                                                                    |  |
| 10 Pruritus                                                                                                    | 10 Pruritus                                                                                                                                  | 10 Pruritus                                                                                                                                                   |  |
| 11 Headache                                                                                                    | 11 Headache                                                                                                                                  | 11 Headache                                                                                                                                                   |  |
| 12 Fatigue                                                                                                     | 12 Fatigue                                                                                                                                   | 12 Fatigue                                                                                                                                                    |  |
| 13 Myalgia                                                                                                     | 13 Myalgia                                                                                                                                   | 13 Myalgia                                                                                                                                                    |  |
| 14 Anxiety                                                                                                     | 14 Anxiety                                                                                                                                   | 14 Anxiety                                                                                                                                                    |  |
| 15 Confusion                                                                                                   | 15 Confusion                                                                                                                                 | 15 Confusion                                                                                                                                                  |  |
|                                                                                                                | 16 Elevated body temperature of >38oC                                                                                                        | 16 Elevated body temperature of >38oC                                                                                                                         |  |
|                                                                                                                | 17 Allergic reaction (rash, urticaria, pruritus, edema)                                                                                      | 17 Allergic reaction (rash, urticaria, pruritus, edema)                                                                                                       |  |
|                                                                                                                | 18 Subjective fever                                                                                                                          | 18 Subjective fever                                                                                                                                           |  |
|                                                                                                                | 19 Malaise                                                                                                                                   | 19 Malaise                                                                                                                                                    |  |
|                                                                                                                | 20 Chills                                                                                                                                    | 20 Chills                                                                                                                                                     |  |
|                                                                                                                | 21 Arthralgia                                                                                                                                | 21 Arthralgia                                                                                                                                                 |  |
|                                                                                                                |                                                                                                                                              | 20 Rigors                                                                                                                                                     |  |
|                                                                                                                |                                                                                                                                              | 21 Sweats                                                                                                                                                     |  |
|                                                                                                                |                                                                                                                                              | 22 Cough                                                                                                                                                      |  |
|                                                                                                                |                                                                                                                                              | 23 Chest pain                                                                                                                                                 |  |
|                                                                                                                |                                                                                                                                              | 24 Palpitations                                                                                                                                               |  |
|                                                                                                                |                                                                                                                                              | 25 Shortness of breath                                                                                                                                        |  |

CV= PfSPZ Challenge Vaccination

173

174

175

176

177 **Table S5. Antibodies to PfCSP and PfMSP1.** All out-of-range, negative and zero values are  
 178 reported as 1.  
 179

| Group (Age)  | PfSPZ/ Dose                       | Infection           | Volunteer ID  | ELISA PfCSP OD 1.0 |                                   |                |                  |              |              |                  | ELISA PfMSP-1 OD 1.0 |            |
|--------------|-----------------------------------|---------------------|---------------|--------------------|-----------------------------------|----------------|------------------|--------------|--------------|------------------|----------------------|------------|
|              |                                   |                     |               | Pre-Immune         | 2 weeks post-3 <sup>rd</sup> dose | NET (Pre-Post) | Ratio (Post/Pre) | pre-CHMI     | NET pre-CHMI | Ratio (Post/Pre) | Pre-Immune           | pre-CHMI   |
| 1a (18-35 y) | 2.7x10 <sup>6</sup> PfSPZ Vaccine | Uninfected          | E21A317       | 30                 | 2,966                             | 2,936          | 98.87            | 2,182        | 2,152        | 71.73            | 1                    | 1          |
|              |                                   |                     | E21A371       | 198                | 5,797                             | 5,599          | 29.28            | 3,575        | 3,377        | 17.06            | 2,283                | 2,632      |
|              |                                   |                     | E21A412       | 130                | 2,358                             | 2,228          | 18.14            | 1,615        | 1,485        | 11.42            | 8,505                | 7,052      |
|              |                                   |                     | E21A414       | 319                | 11,569                            | 11,250         | 36.27            | 15,892       | 15,573       | 48.82            | 355                  | 365        |
|              |                                   |                     | E21A416       | -                  | 2,911                             | 2,911          | 2,911.00         | 2,494        | 2,494        | 2,494.00         | -                    | 1,432      |
|              |                                   |                     | E21A444       | 17                 | 5,867                             | 5,850          | 345.12           | 4,014        | 3,997        | 235.12           | 1                    | 30         |
|              |                                   |                     | <b>Median</b> | <b>130</b>         | <b>4,382</b>                      | <b>4,268</b>   | <b>67.57</b>     | <b>3,035</b> | <b>2,936</b> | <b>60.28</b>     | <b>355</b>           | <b>899</b> |
|              |                                   | Infected            | E21A309       | 39                 | 5,021                             | 4,982          | 128.74           | 5,442        | 5,403        | 138.54           | 48                   | 33         |
|              |                                   |                     | E21A311       | 108                | 4,001                             | 3,893          | 37.05            | 1,094        | 986          | 9.13             | 121                  | 98         |
|              |                                   |                     | E21A313       | 224                | 14,587                            | 14,363         | 65.12            | 4,504        | 4,280        | 19.11            | 67                   | 48         |
|              |                                   |                     | E21A314       | 73                 | 2,261                             | 2,188          | 30.97            | 520          | 447          | 6.12             | 19                   | 20         |
|              |                                   |                     | E21A316       | 21                 | 2,052                             | 2,031          | 97.71            | 1,027        | 1,006        | 47.90            | 28                   | 26         |
|              |                                   |                     | E21A399       | 1                  | 2,601                             | 2,600          | 2,601.00         | 1,057        | 1,056        | 1,056.00         | 24,988               | 15,331     |
|              |                                   |                     | E21A402       | 55                 | 599                               | 544            | 10.89            | 320          | 265          | 4.82             | 447                  | 238        |
|              |                                   |                     | E21A417       | 1,363              | 4,499                             | 3,136          | 3.30             | 2,381        | 1,018        | 0.75             | 11,376               | 5,534      |
|              |                                   |                     | E21A426       | 958                | 6,474                             | 5,516          | 6.76             | -            | -            | -                | -                    | -          |
|              |                                   |                     | E21A433       | 31                 | 1,251                             | 1,220          | 40.35            | 1,359        | 1,328        | 42.84            | 1                    | 1          |
|              |                                   |                     | E21A448       | 7                  | 909                               | 902            | 129.86           | 384          | 377          | 53.86            | 83                   | 62         |
|              |                                   |                     | <b>Median</b> | <b>55</b>          | <b>2,601</b>                      | <b>2,600</b>   | <b>40.35</b>     | <b>1,076</b> | <b>1,012</b> | <b>30.97</b>     | <b>75</b>            | <b>55</b>  |
|              |                                   | <b>Group Median</b> | <b>64</b>     | <b>2,966</b>       | <b>2,936</b>                      | <b>40.35</b>   | <b>1,899</b>     | <b>1,407</b> | <b>45.37</b> | <b>83</b>        | <b>80</b>            |            |
| 1b (18-35 y) | 1.0x10 <sup>5</sup> PfSPZ-CVac    | Uninfected          | E21B-407      | 98                 | 740                               | 642            | 7.55             | 618          | 520          | 6.31             | 20,612               | 19,348     |
|              |                                   |                     | E21B-446      | 104                | 906                               | 802            | 8.71             | 722          | 618          | 6.94             | 50                   | 103        |
|              |                                   |                     | E21B-508      | 337                | 386                               | 49             | 1.15             | 954          | 617          | 2.83             | 4,743                | 3,864      |
|              |                                   |                     | E21B-509      | 359                | 1,633                             | 1,274          | 4.55             | 5,721        | 5,362        | 15.94            | 1,021                | 2,136      |
|              |                                   |                     | E21B-518      | 464                | 643                               | 179            | 1.39             | 677          | 213          | 1.46             | 13,377               | 15,448     |
|              |                                   |                     | E21B-525      | 284                | 316                               | 32             | 1.11             | -            | -            | -                | -                    | -          |
|              |                                   |                     | E21B-526      | 247                | 1,327                             | 1,080          | 5.37             | 1,425        | 1,178        | 5.77             | 234                  | 899        |
|              |                                   |                     | E21B-530      | 52                 | 155                               | 103            | 2.98             | -            | -            | -                | -                    | -          |
|              |                                   | <b>Median</b>       | <b>266</b>    | <b>692</b>         | <b>411</b>                        | <b>3.76</b>    | <b>838</b>       | <b>618</b>   | <b>6.04</b>  | <b>2,882</b>     | <b>3,000</b>         |            |
|              |                                   | Infected            | E21B-379      | 210                | 1,555                             | 1,345          | 7.40             | 898          | 688          | 4.28             | 1                    | 423        |
|              |                                   |                     | E21B-401      | 139                | 345                               | 206            | 2.48             | 566          | 427          | 4.07             | 1,377                | 669        |
|              |                                   |                     | E21B-458      | 112                | 685                               | 573            | 6.12             | 323          | 211          | 2.88             | 32                   | 361        |
|              |                                   |                     | E21B-519      | 196                | 275                               | 79             | 1.40             | 489          | 293          | 2.49             | 5,919                | 6,908      |
|              |                                   |                     | E21B-527      | 257                | 515                               | 258            | 2.00             | 384          | 127          | 1.49             | 88                   | 46         |
|              |                                   |                     | <b>Median</b> | <b>196</b>         | <b>515</b>                        | <b>258</b>     | <b>2.48</b>      | <b>489</b>   | <b>293</b>   | <b>2.49</b>      | <b>88</b>            | <b>423</b> |
|              |                                   | <b>Group Median</b> | <b>210</b>    | <b>643</b>         | <b>258</b>                        | <b>2.98</b>    | <b>677</b>       | <b>520</b>   | <b>4.07</b>  | <b>1,021</b>     | <b>899</b>           |            |

|              |              |            |         |     |     |      |      |     |      |      |       |       |
|--------------|--------------|------------|---------|-----|-----|------|------|-----|------|------|-------|-------|
| 1b (18-35 y) | Placebo      | UnInfected | E21A422 | 108 | 95  | 1    | 0.88 | 147 | 39   | 1.36 | 1,525 | 2,036 |
|              |              | Infected   | E21A411 | 979 | 814 | 1    | 0.83 | 559 | 1    | 0.57 | 547   | 223   |
|              | E21A303      |            | 64      | 44  | 1   | 0.69 | 57   | 1   | 0.89 | 1    | 13    |       |
|              | E21A431      |            | 254     | 294 | 40  | 1.16 | 300  | 46  | 1.18 | 191  | 306   |       |
|              | E21A472      |            | 18      | 22  | 4   | 1.22 | 31   | 13  | 1.72 | 303  | 414   |       |
|              | E21B-353     |            | 92      | 95  | 3   | 1.03 | 171  | 79  | 1.86 | 97   | 125   |       |
|              | E21B-459     |            | 48      | 49  | 1   | 1.02 | -    | -   | -    | -    | -     |       |
|              | Group Median |            |         | 92  | 95  | 1    | 1.02 | 159 | 26   | 1.27 | 247   | 265   |

180 **Table S6: Solicited Adverse Events Post-Vaccination.** Adverse events are shown as the  
181 number of subjects (% of subjects) experiencing the adverse event by dose and stratified  
182 according to the greatest severity reported. Boxes are shaded to highlight the positive responses  
183 (blue – no grade assigned; yellow – mild; orange – moderate). Gray shaded boxes represent  
184 symptoms not solicited for PfSPZ Vaccine.







|                 |                  | PfSPZ Vaccine       |                |                |               |               |               | PfSPZ-CVac          |                |                |               |               |               |
|-----------------|------------------|---------------------|----------------|----------------|---------------|---------------|---------------|---------------------|----------------|----------------|---------------|---------------|---------------|
|                 |                  | 2.7x10 <sup>6</sup> |                |                | Placebo       |               |               | 1.0x10 <sup>5</sup> |                |                | Placebo       |               |               |
| Solicited Event | Grade            | Dose 1<br>N=20      | Dose 2<br>N=18 | Dose 3<br>N=18 | Dose 1<br>N=6 | Dose 2<br>N=6 | Dose 3<br>N=6 | Dose 1<br>N=19      | Dose 2<br>N=18 | Dose 3<br>N=18 | Dose 1<br>N=5 | Dose 2<br>N=5 | Dose 3<br>N=4 |
| Confusion       | Grade 1-Mild     |                     |                |                |               |               |               | 0                   | 0              | 0              | 0             | 0             | 0             |
|                 | Grade 2-Moderate |                     |                |                |               |               |               | 0                   | 0              | 0              | 0             | 0             | 0             |
|                 | Grade 3-Severe   |                     |                |                |               |               |               | 0                   | 0              | 0              | 0             | 0             | 0             |
| Cough           | Grade 1-Mild     |                     |                |                |               |               |               | 0                   | 1 (5.6)        | 0              | 0             | 0             | 0             |
|                 | Grade 2-Moderate |                     |                |                |               |               |               | 0                   | 0              | 0              | 0             | 0             | 0             |
|                 | Grade 3-Severe   |                     |                |                |               |               |               | 0                   | 0              | 0              | 0             | 0             | 0             |
| Diarrhea        | Grade 1-Mild     |                     |                |                |               |               |               | 0                   | 1 (5.6)        | 0              | 0             | 0             | 0             |
|                 | Grade 2-Moderate |                     |                |                |               |               |               | 0                   | 0              | 1 (5.6)        | 0             | 0             | 0             |
|                 | Grade 3-Severe   |                     |                |                |               |               |               | 0                   | 0              | 0              | 0             | 0             | 0             |
| Dizziness       | Reported*        |                     |                |                |               |               |               | 1 (5.3)             | 0              | 0              | 2 (40.0)      | 0             | 0             |
|                 | Grade 1-Mild     |                     |                |                |               |               |               | 0                   | 1 (5.6)        | 0              | 1 (20.0)      | 0             | 0             |
|                 | Grade 2-Moderate |                     |                |                |               |               |               | 0                   | 0              | 0              | 0             | 0             | 0             |
|                 | Grade 3-Severe   |                     |                |                |               |               |               | 0                   | 0              | 0              | 0             | 0             | 0             |
| Fatigue         | Reported*        | 1 (5.0)             | 0              | 1 (5.6)        | 0             | 0             | 0             | 1 (5.3)             | 0              | 0              | 0             | 0             | 0             |
|                 | Grade 1-Mild     | 2 (10.0)            | 0              | 1 (5.6)        | 0             | 0             | 0             | 0                   | 0              | 1 (5.6)        | 1 (20.0)      | 0             | 0             |
|                 | Grade 2-Moderate | 0                   | 0              | 0              | 0             | 0             | 0             | 0                   | 0              | 0              | 0             | 0             | 0             |
|                 | Grade 3-Severe   | 0                   | 0              | 0              | 0             | 0             | 0             | 0                   | 0              | 0              | 0             | 0             | 0             |
| Fever           | Grade 1-Mild     | 0                   | 0              | 0              | 0             | 0             | 0             | 0                   | 1 (5.6)        | 0              | 0             | 0             | 0             |
|                 | Grade 2-Moderate | 0                   | 0              | 0              | 0             | 0             | 0             | 0                   | 0              | 0              | 0             | 0             | 0             |
|                 | Grade 3-Severe   | 0                   | 0              | 0              | 0             | 0             | 0             | 0                   | 0              | 0              | 0             | 0             | 0             |

|                 |                  | PfSPZ Vaccine       |                |                |               |               |               | PfSPZ-CVac          |                |                |               |               |               |
|-----------------|------------------|---------------------|----------------|----------------|---------------|---------------|---------------|---------------------|----------------|----------------|---------------|---------------|---------------|
|                 |                  | 2.7x10 <sup>6</sup> |                |                | Placebo       |               |               | 1.0x10 <sup>5</sup> |                |                | Placebo       |               |               |
| Solicited Event | Grade            | Dose 1<br>N=20      | Dose 2<br>N=18 | Dose 3<br>N=18 | Dose 1<br>N=6 | Dose 2<br>N=6 | Dose 3<br>N=6 | Dose 1<br>N=19      | Dose 2<br>N=18 | Dose 3<br>N=18 | Dose 1<br>N=5 | Dose 2<br>N=5 | Dose 3<br>N=4 |
| Headache        | Reported*        | 1 (5.0)             | 0              | 1 (5.6)        | 0             | 0             | 0             | 1 (5.3)             | 0              | 0              | 0             | 0             | 0             |
|                 | Grade 1-Mild     | 0                   | 0              | 0              | 0             | 0             | 0             | 2 (10.5)            | 1 (5.6)        | 0              | 1 (20.0)      | 0             | 0             |
|                 | Grade 2-Moderate | 1 (5.0)             | 0              | 0              | 0             | 0             | 0             | 0                   | 2 (11.1)       | 0              | 0             | 0             | 0             |
|                 | Grade 3-Severe   | 0                   | 0              | 0              | 0             | 0             | 0             | 0                   | 0              | 0              | 0             | 0             | 0             |
| Insomnia        | Grade 1-Mild     |                     |                |                |               |               |               | 0                   | 1 (5.6)        | 0              | 0             | 0             | 0             |
|                 | Grade 2-Moderate |                     |                |                |               |               |               | 0                   | 0              | 0              | 0             | 0             | 0             |
|                 | Grade 3-Severe   |                     |                |                |               |               |               | 0                   | 0              | 0              | 0             | 0             | 0             |
| Malaise         | Grade 1-Mild     | 0                   | 0              | 0              | 0             | 0             | 0             | 0                   | 0              | 0              | 0             | 0             | 0             |
|                 | Grade 2-Moderate | 0                   | 0              | 0              | 0             | 0             | 0             | 0                   | 0              | 0              | 0             | 0             | 0             |
|                 | Grade 3-Severe   | 0                   | 0              | 0              | 0             | 0             | 0             | 0                   | 0              | 0              | 0             | 0             | 0             |
| Myalgia         | Reported*        | 1 (5.0)             | 0              | 0              | 0             | 0             | 0             | 0                   | 0              | 0              | 0             | 0             | 0             |
|                 | Grade 1-Mild     | 2 (10.0)            | 0              | 0              | 0             | 0             | 0             | 0                   | 0              | 0              | 1 (20.0)      | 1 (20.0)      | 0             |
|                 | Grade 2-Moderate | 0                   | 0              | 0              | 0             | 0             | 0             | 0                   | 0              | 0              | 0             | 0             | 0             |
|                 | Grade 3-Severe   | 0                   | 0              | 0              | 0             | 0             | 0             | 0                   | 0              | 0              | 0             | 0             | 0             |
| Nausea          | Reported*        |                     |                |                |               |               |               | 0                   | 0              | 0              | 0             | 1 (20.0)      | 0             |
|                 | Grade 1-Mild     |                     |                |                |               |               |               | 1 (5.3)             | 0              | 0              | 0             | 0             | 0             |
|                 | Grade 2-Moderate |                     |                |                |               |               |               | 0                   | 0              | 0              | 0             | 0             | 0             |
|                 | Grade 3-Severe   |                     |                |                |               |               |               | 0                   | 0              | 0              | 0             | 0             | 0             |
| Palpitations    | Grade 1-Mild     |                     |                |                |               |               |               | 0                   | 0              | 0              | 0             | 0             | 0             |
|                 | Grade 2-Moderate |                     |                |                |               |               |               | 0                   | 0              | 0              | 0             | 0             | 0             |
|                 | Grade 3-Severe   |                     |                |                |               |               |               | 0                   | 0              | 0              | 0             | 0             | 0             |

|                                  |                  | PfSPZ Vaccine       |                |                |               |               |               | PfSPZ-CVac          |                |                |               |               |               |
|----------------------------------|------------------|---------------------|----------------|----------------|---------------|---------------|---------------|---------------------|----------------|----------------|---------------|---------------|---------------|
|                                  |                  | 2.7x10 <sup>6</sup> |                |                | Placebo       |               |               | 1.0x10 <sup>5</sup> |                |                | Placebo       |               |               |
| Solicited Event                  | Grade            | Dose 1<br>N=20      | Dose 2<br>N=18 | Dose 3<br>N=18 | Dose 1<br>N=6 | Dose 2<br>N=6 | Dose 3<br>N=6 | Dose 1<br>N=19      | Dose 2<br>N=18 | Dose 3<br>N=18 | Dose 1<br>N=5 | Dose 2<br>N=5 | Dose 3<br>N=4 |
| Photosensitivity                 | Grade 1-Mild     |                     |                |                |               |               |               | 0                   | 0              | 0              | 0             | 0             | 0             |
|                                  | Grade 2-Moderate |                     |                |                |               |               |               | 0                   | 0              | 0              | 0             | 0             | 0             |
|                                  | Grade 3-Severe   |                     |                |                |               |               |               | 0                   | 0              | 0              | 0             | 0             | 0             |
| Pruritus                         | Reported*        |                     |                |                |               |               |               | 1 (5.3)             | 0              | 0              | 0             | 0             | 0             |
|                                  | Grade 1-Mild     |                     |                |                |               |               |               | 1 (5.3)             | 0              | 0              | 0             | 0             | 0             |
|                                  | Grade 2-Moderate |                     |                |                |               |               |               | 0                   | 0              | 0              | 0             | 0             | 0             |
|                                  | Grade 3-Severe   |                     |                |                |               |               |               | 0                   | 0              | 0              | 0             | 0             | 0             |
| Rash, urticaria, pruritus, edema | Reported*        | 0                   | 0              | 0              | 0             | 0             | 0             | 1 (5.3)             | 0              | 0              | 0             | 0             | 0             |
|                                  | Grade 1-Mild     | 0                   | 0              | 0              | 0             | 0             | 0             | 1 (5.3)             | 0              | 0              | 0             | 0             | 0             |
|                                  | Grade 2-Moderate | 0                   | 0              | 0              | 0             | 0             | 0             | 0                   | 0              | 0              | 0             | 0             | 0             |
|                                  | Grade 3-Severe   | 0                   | 0              | 0              | 0             | 0             | 0             | 0                   | 0              | 0              | 0             | 0             | 0             |
| Rigors                           | Grade 1-Mild     |                     |                |                |               |               |               | 0                   | 0              | 0              | 0             | 0             | 0             |
|                                  | Grade 2-Moderate |                     |                |                |               |               |               | 0                   | 0              | 0              | 0             | 0             | 0             |
|                                  | Grade 3-Severe   |                     |                |                |               |               |               | 0                   | 0              | 0              | 0             | 0             | 0             |
| Shortness of Breath              | Grade 1-Mild     |                     |                |                |               |               |               | 0                   | 0              | 0              | 0             | 0             | 0             |
|                                  | Grade 2-Moderate |                     |                |                |               |               |               | 0                   | 0              | 0              | 0             | 0             | 0             |
|                                  | Grade 3-Severe   |                     |                |                |               |               |               | 0                   | 0              | 0              | 0             | 0             | 0             |
| Subjective Fever                 | Reported*        | 0                   | 0              | 1 (5.6)        | 0             | 0             | 0             | 0                   | 0              | 0              | 0             | 0             | 0             |
|                                  | Grade 1-Mild     | 1 (5.0)             | 1 (5.6)        | 0              | 0             | 0             | 0             | 1 (5.3)             | 1 (5.6)        | 0              | 0             | 0             | 0             |
|                                  | Grade 2-Moderate | 0                   | 0              | 0              | 0             | 0             | 0             | 0                   | 0              | 0              | 0             | 0             | 0             |
|                                  | Grade 3-Severe   | 0                   | 0              | 0              | 0             | 0             | 0             | 0                   | 0              | 0              | 0             | 0             | 0             |

|                 |                  | PfSPZ Vaccine       |                |                |               |               |               | PfSPZ-CVac          |                |                |               |               |               |
|-----------------|------------------|---------------------|----------------|----------------|---------------|---------------|---------------|---------------------|----------------|----------------|---------------|---------------|---------------|
|                 |                  | 2.7x10 <sup>6</sup> |                |                | Placebo       |               |               | 1.0x10 <sup>5</sup> |                |                | Placebo       |               |               |
| Solicited Event | Grade            | Dose 1<br>N=20      | Dose 2<br>N=18 | Dose 3<br>N=18 | Dose 1<br>N=6 | Dose 2<br>N=6 | Dose 3<br>N=6 | Dose 1<br>N=19      | Dose 2<br>N=18 | Dose 3<br>N=18 | Dose 1<br>N=5 | Dose 2<br>N=5 | Dose 3<br>N=4 |
| Sweats          | Grade 1-Mild     |                     |                |                |               |               |               | 0                   | 0              | 0              | 0             | 0             | 0             |
|                 | Grade 2-Moderate |                     |                |                |               |               |               | 0                   | 0              | 0              | 0             | 0             | 0             |
|                 | Grade 3-Severe   |                     |                |                |               |               |               | 0                   | 0              | 0              | 0             | 0             | 0             |
| Tinnitus        | Grade 1-Mild     |                     |                |                |               |               |               | 0                   | 0              | 0              | 1 (20.0)      | 0             | 0             |
|                 | Grade 2-Moderate |                     |                |                |               |               |               | 0                   | 0              | 0              | 0             | 0             | 0             |
|                 | Grade 3-Severe   |                     |                |                |               |               |               | 0                   | 0              | 0              | 0             | 0             | 0             |
| Vomiting        | Grade 1-Mild     |                     |                |                |               |               |               | 0                   | 0              | 0              | 0             | 0             | 0             |
|                 | Grade 2-Moderate |                     |                |                |               |               |               | 0                   | 0              | 0              | 0             | 0             | 0             |
|                 | Grade 3-Severe   |                     |                |                |               |               |               | 0                   | 0              | 0              | 0             | 0             | 0             |

Denominators are based on the number of subjects with systemic solicited event records submitted for each vaccine dose at the time of data cutoff  
 \*Symptom was reported but grading was not done.

185

186

187 **Table S7: Abnormal Laboratory Values<sup>a</sup>.** Number (and %) of subjects in each group  
 188 experiencing the listed lab abnormality at least one during the study period.  
 189

| Lab parameter            | Group 1A                      |                  | Group 1B                      |                  |
|--------------------------|-------------------------------|------------------|-------------------------------|------------------|
|                          | 2.7x10 <sup>6</sup><br>(N=20) | Placebo<br>(N=6) | 1.0x10 <sup>5</sup><br>(N=19) | Placebo<br>(N=5) |
| Red Blood Cells          | 0 (0.0)                       | 0 (0.0)          | 0 (0.0)                       | 0 (0.0)          |
| Decreased Hemoglobin     | 2 (10.0)                      | 2 (33.3)         | 3 (15.8)                      | 0 (0.0)          |
| Decreased Platelets      | 2 (10.0)                      | 1 (16.7)         | 2 (10.5)                      | 1 (20.0)         |
| Increased WBC Count      | 0 (0.0)                       | 0 (0.0)          | 1 (5.3)                       | 2 (40.0)         |
| Decreased WBC Count      | 7 (35.0)                      | 3 (50.0)         | 9 (47.4)                      | 0 (0.0)          |
| Decreased Neutrophils    | 15 (75.0)                     | 4 (66.7)         | 18 (94.7) <sup>†</sup>        | 2 (40.0)         |
| Decreased Lymphocytes    | 3 (15.0)                      | 2 (33.3)         | 5 (26.3)                      | 0 (0.0)          |
| Increased Eosinophils    | 7 (35.0)                      | 3 (50.0)         | 9 (47.4)                      | 3 (60.0)         |
| Elevated ALT             | 2 (10.0)                      | 3 (50.0)         | 4 (21.1)                      | 2 (40.0)         |
| Elevated AST             | 3 (15.0)                      | 1 (16.7)         | 5 (26.3)                      | 2 (40.0)         |
| Elevated Total Bilirubin | 0 (0.0)                       | 0 (0.0)          | 1 (5.3)*                      | 0 (0.0)          |
| Elevated Creatinine      | 4 (20.0)                      | 1 (16.7)         | 3 (15.8)                      | 0 (0.0)          |
| Hypoglycemia             | 0 (0.0)                       | 0 (0.0)          | 0 (0.0)                       | 0 (0.0)          |

190 \*Includes at least one Grade 3 result.

191 <sup>†</sup>p=0.0089, Barnard's test, 2-tailed. No other comparison between vaccine and corresponding control was  
 192 statistically significant.  
 193

194  
195  
196

**Table S8: Asymptomatic parasitemia detected during the study prior to CHMI.**

| Study number | Group or prospective group | Vaccine                   | Time point(s)      | Species                                      |
|--------------|----------------------------|---------------------------|--------------------|----------------------------------------------|
| 408          | PfSPZ Vaccine              | 2.7x10 <sup>6</sup> PfSPZ | Screening          | <i>P. malariae</i>                           |
|              |                            |                           | V2                 | <i>P. falciparum</i>                         |
|              |                            |                           | CHMI-7             | <i>P. falciparum</i>                         |
|              |                            |                           | CHMI               | <i>P. falciparum</i> ,<br><i>P. malariae</i> |
| 415          | PfSPZ Vaccine              | placebo                   | V3, V3+28, V3+56   | <i>P. malariae</i>                           |
| 416          | PfSPZ Vaccine              | 2.7x10 <sup>6</sup> PfSPZ | V3                 | <i>P. ovale</i>                              |
|              |                            |                           | V3+196             | <i>P. falciparum</i>                         |
| 431          | PfSPZ Vaccine              | placebo                   | Scr3               | <i>P. falciparum</i> ,<br><i>P. malariae</i> |
|              |                            |                           | V2                 | <i>P. malariae</i>                           |
|              |                            |                           | V3, V3+28, V3+56   | <i>P. falciparum</i>                         |
|              |                            |                           |                    |                                              |
| 404          | PfSPZ-CVac                 | 1.0x10 <sup>5</sup> PfSPZ | CHMI-7             | <i>P. falciparum</i>                         |
| 512          | PfSPZ-CVac                 | 1.0x10 <sup>5</sup> PfSPZ | CHMI-7, CHMI-7 (2) | <i>P. falciparum</i> *                       |
| 515          | PfSPZ-CVac                 | placebo                   | CHMI               | <i>P. falciparum</i> *                       |
| 519          | PfSPZ-CVac                 | 1.0x10 <sup>5</sup> PfSPZ | Sc3                | <i>P. falciparum</i>                         |
| 525          | PfSPZ-CVac                 | 1.0x10 <sup>5</sup> PfSPZ | V3, V3+14, CHMI-7  | <i>P. falciparum</i> *                       |
| 528          | PfSPZ-CVac                 | 1.0x10 <sup>5</sup> PfSPZ | CHMI-7             | <i>P. falciparum</i> ,<br><i>P. ovale</i>    |
| 530          | PfSPZ-CVac                 | 1.0x10 <sup>5</sup> PfSPZ | CHMI-7             | <i>P. falciparum</i>                         |

197 \* - genotyping confirmed as wild type or not the PfSPZ Challenge strain (NF54).  
198 For the remaining Pf isolates in the PfSPZ-CVac arm, genotyping was either not performed (2)  
199 or inconclusive (2). In the PfSPZ Vaccine arm, all Pf infections were assumed to be naturally  
200 acquired field strains.



201 Table S9: Genotype data:

202

| sample metadata      |     |          | malaria qPCR data |        | msp1/msp2 genotyping |        |        |         |          | drug resistance marker |                   |              | microsatellite genotyping |       |       |       |       |       | Conclusion                                            |
|----------------------|-----|----------|-------------------|--------|----------------------|--------|--------|---------|----------|------------------------|-------------------|--------------|---------------------------|-------|-------|-------|-------|-------|-------------------------------------------------------|
| Sid                  | grp | visit    | pf/uL             | Non-Pf | msp1_k               | msp1_m | msp1_r | msp2_fc | msp2_ic  | k13                    | dhfr              | dhps         | Poly-A                    | PFPK2 | TA-81 | ARA-2 | TA-87 | TA-40 |                                                       |
| culture derived NF54 |     |          | -                 | -      | 250                  | -      | -      | -       | 500      | PFNF54                 | PFNF54            | PFNF54       | 153                       | 172   | 123   | 67    | 100   | 223   | PFNF54                                                |
| 512                  | G1B | PD       | 0.35              | -      | -                    | 200    | -      | -       | -        | -                      | -                 | -            | -                         | -     | -     | -     | -     | -     | field strain                                          |
| 525                  | G1B | PD       | 10.1              | -      | 200                  | -      | -      | -       | 500; 600 | PFNF54                 | N51I; C59R; S108N | PFNF54       | -                         | -     | -     | -     | -     | -     | multiple strain infection, PfNF54 unlikely            |
| 525                  | G1B | CH-7     | 22.1              | -      | 200                  | -      | -      | -       | 500; 600 | PFNF54                 | N51I; C59R; S108N | PFNF54       | -                         | -     | -     | -     | -     | -     | field strain                                          |
| 528                  | G1B | CH-7     | 92.2              | Po     | 250; 400             | 200    | -      | 350     | 500      | PFNF54                 | N51I; C59R; S108N | PFNF54       | -                         | -     | -     | -     | -     | -     | multiple strain infection, PfNF54 can NOT be excluded |
| 529                  | G1B | CH-7     | 0.9               | -      | -                    | -      | -      | -       | -        | -                      | -                 | -            | -                         | -     | -     | -     | -     | -     | inconclusive                                          |
| 530                  | G1B | CH-7     | 0.1               | -      | -                    | -      | -      | -       | -        | -                      | -                 | -            | -                         | -     | -     | -     | -     | -     | inconclusive                                          |
| 510                  | G1B | CH-7     | 0.25              | -      | -                    | -      | -      | -       | -        | -                      | -                 | -            | -                         | -     | 124   | -     | -     | -     | inconclusive                                          |
| 515                  | G1B | PD       | 84.9              | -      | -                    | 200    | -      | -       | 700      | PFNF54                 | N51I; C59R; S108N | S436A; G437A | -                         | 164   | -     | 70    | 109   | -     | field strain                                          |
| 316                  | G1A | CH+18 TO | 63.2              | -      | 250                  | -      | -      | -       | 500      | PFNF54                 | PFNF54            | PFNF54       | -                         | -     | 122   | -     | -     | -     | PfNF54                                                |
| 314                  | G1A | CH+18 TO | 25                | -      | 250                  | -      | -      | -       | 500      | PFNF54                 | PFNF54            | -            | -                         | -     | 122   | -     | -     | -     | PfNF54                                                |
| 303                  | G1A | CH+13 TO | 59.3              | -      | 250                  | -      | -      | -       | 500      | PFNF54                 | PFNF54            | PFNF54       | -                         | -     | -     | 67    | 100   | -     | PfNF54                                                |
| 309                  | G1A | CH+18 TO | 53.5              | -      | 250                  | -      | -      | -       | 500      | PFNF54                 | PFNF54            | PFNF54       | -                         | -     | 122   | -     | -     | -     | PfNF54                                                |

203

204

205

206  
207  
208  
209  
210  
211  
212

**Table S10. Solicited AE, unsolicited AE and symptoms and signs of malaria.** Solicited AE were collected for 5 days after CHMI. Specific symptoms and signs of malaria were solicited at each visit starting at day 7 through to day 29 and were attributed to malaria if they corresponded to Pf parasitemia as described. Unsolicited AE not corresponding to parasitemia and presumed unrelated to malaria were collected from days 1 to 29.

|                                                                   | All (n=36) | TBS+/qPCR+ (n=15) | TBS-/qPCR+ (n=6) | TBS-/qPCR- (n=15) |
|-------------------------------------------------------------------|------------|-------------------|------------------|-------------------|
| Number subjects (%) with solicited AEs, CHMI days 1-6             | 1 (2.8%)   |                   |                  |                   |
| Number of subjects with symptoms or signs of malaria*             | 9 (25.0%)  | 8 (53.3%)         | 1 (16.7%)        | 0 (0.0%)          |
| Number subjects with unsolicited AEs, CHMI days 1-29 <sup>#</sup> | 7 (19.4%)  | 2 (13.3%)         | 2 (33.3%)        | 3 (20.0%)         |

213  
214  
215  
216  
217  
218  
219  
220  
221  
222

\*Symptoms or signs of malaria were identified using a predefined list of symptoms or signs occurring from 3 days prior to 7 days after the detection of parasitemia by TBS. For the one qPCR+/TBS- subject with symptoms the identified symptoms occurred beginning 5 days after the first positive sample was positive by qPCR.

<sup>#</sup>Unsolicited AE included toothache (3), arthralgias, conjunctivitis, left foot swelling, nipple pain, trauma to the right great toe and upper lip swelling. None were considered related to injection of PfSPZ Challenge.
